# Supplementary material for: Binding of the Antagonist Caffeine to the Human Adenosine Receptor hA2AR in Nearly Physiological Conditions
Source: PubMed Central journal article supplement (PMC4439127; doi:10.1371/journal.pone.0126833), 2015-05-20
Supplement: pone.0126833.s001.pdf [file pone.0126833.s001.pdf]

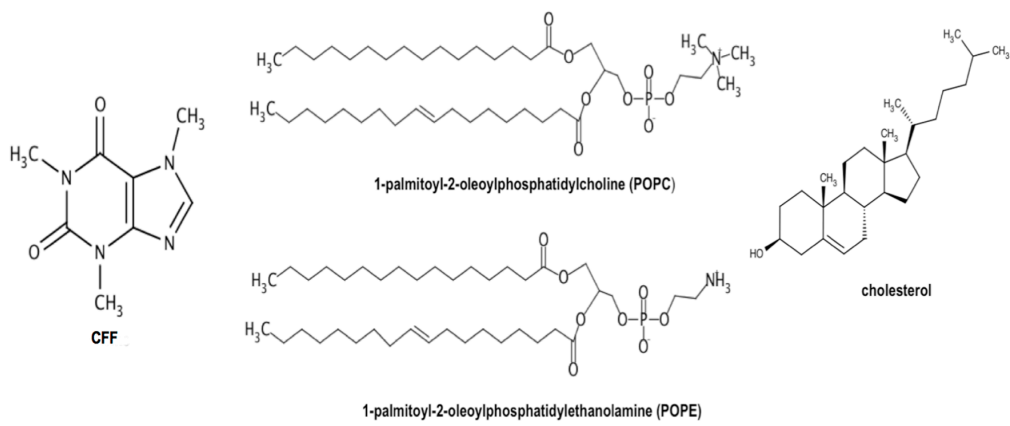

Supporting Information S1 Fig. Chemical structures of CFF, POPC, POPE and cholesterol molecules.
