# Supplementary material for: Binding of the Antagonist Caffeine to the Human Adenosine Receptor hA2AR in Nearly Physiological Conditions
Source: PubMed Central journal article supplement (PMC4439127; doi:10.1371/journal.pone.0126833), 2015-05-20
Supplement: pone.0126833.s002.pdf [file pone.0126833.s002.pdf]

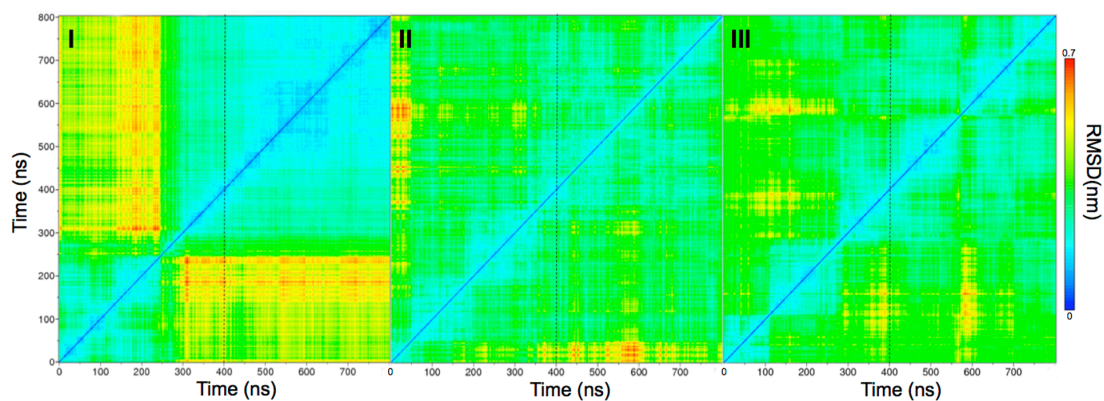

**Supporting Information S2 Fig. Pairwise RMSD matrix of C $\alpha$  atoms.** The matrix elements are calculated every 2ns over the 800-ns MD trajectories of systems I-III [1]. The color scale shown on the right of the figure quantifies the similarity of the pairs' conformations. The pattern after 400 ns resembles that reported in ref. [1] and it is a signature of convergence [1]. The non-converged and converged substates are separated by black dotted lines.

#### Supporting References

1. Grossfield A, Zuckerman DM (2009) Quantifying uncertainty and sampling quality in biomolecular simulations. *Annual reports in computational chemistry* 5: 23-48.
