# Supplementary material for: Binding of the Antagonist Caffeine to the Human Adenosine Receptor hA2AR in Nearly Physiological Conditions
Source: PubMed Central journal article supplement (PMC4439127; doi:10.1371/journal.pone.0126833), 2015-05-20
Supplement: pone.0126833.s003.pdf [file pone.0126833.s003.pdf]

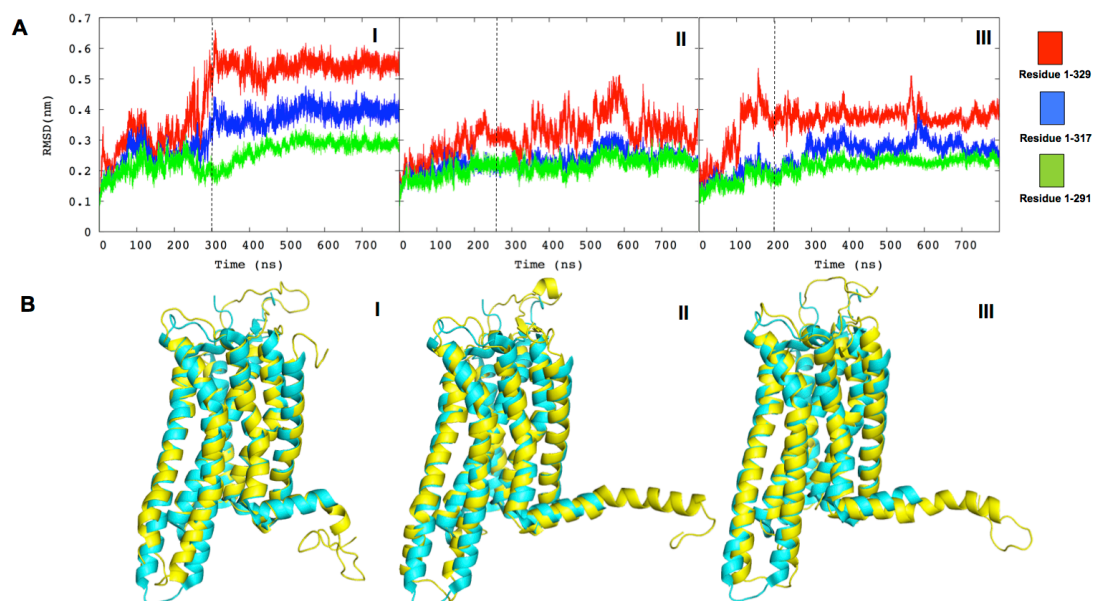

**Supporting Information S3 Fig. Proteins' backbone.** **A)**  $\alpha$  root-mean-square-deviations (RMSDs) of hA<sub>2A</sub>R across the three systems are plotted as a function of the simulated time. The RMSD values for the full lengths hA<sub>2A</sub>R (residue 1-329), hA<sub>2A</sub>R without histidine tag [1] (residue 1-317) and truncated hA<sub>2A</sub>R (residue 1-291) are represented in red, blue and green, respectively. A dotted black line indicates where RMSDs start to oscillate around averaged values. **B)** Superposition between representative receptor structures obtained by clustering procedure [2] of the three MD simulations (yellow) and the CFF/hA<sub>2A</sub>R complex X-ray structure [1] (cyan).

#### Supporting references

1. Doré Andrew S, Robertson N, Errey James C, Ng I, Hollenstein K, Tehan B, et al. (2011) Structure of the adenosine A<sub>2A</sub> receptor in complex with ZM241385 and the xanthenes XAC and caffeine. *Structure* 19: 1283-1293.
2. Daura X, Gademann K, Jaun B, Seebach D, van Gunsteren WF, Mark AE (1999) Peptide folding: when simulation meets experiment. *Angewandte Chemie International Edition* 38: 236-240.
