# Supplementary material for: Binding of the Antagonist Caffeine to the Human Adenosine Receptor hA2AR in Nearly Physiological Conditions
Source: PubMed Central journal article supplement (PMC4439127; doi:10.1371/journal.pone.0126833), 2015-05-20
Supplement: pone.0126833.s008.pdf [file pone.0126833.s008.pdf]

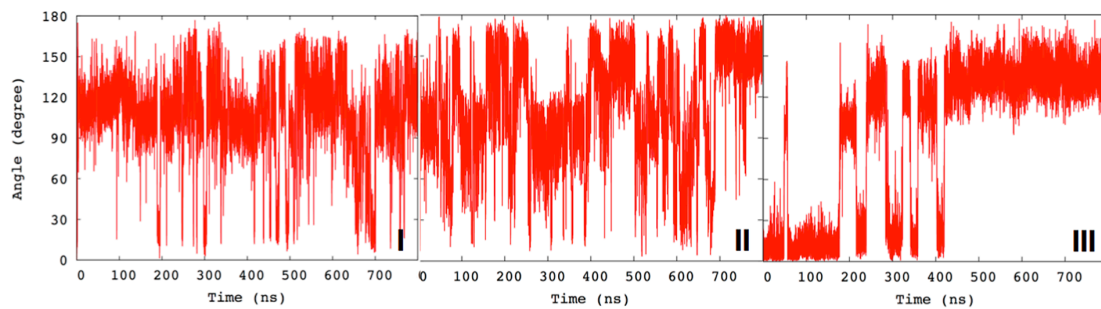

**Supporting Information S8 Fig. CFF orientational flipping angle.** For each system, I-III, the CFF orientational flipping angle is plotted as a function of MD simulated time over the entire trajectory.
