# Supplementary material for: Binding of the Antagonist Caffeine to the Human Adenosine Receptor hA2AR in Nearly Physiological Conditions
Source: PubMed Central journal article supplement (PMC4439127; doi:10.1371/journal.pone.0126833), 2015-05-20
Supplement: pone.0126833.s009.pdf [file pone.0126833.s009.pdf]

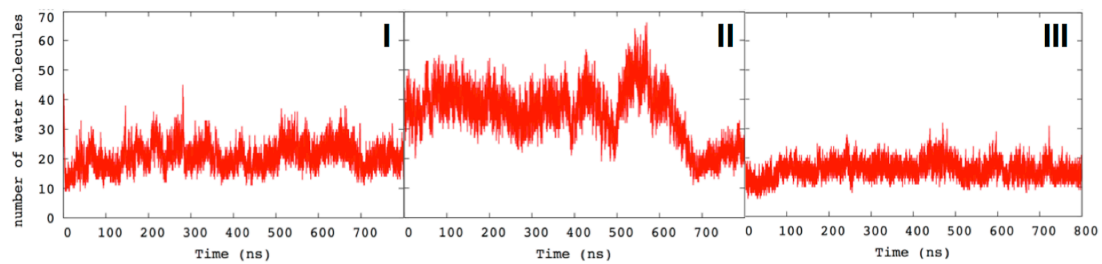

**Supporting Information S9 Fig. The hydration of the ligand binding cavity of hA<sub>2A</sub>R.** For each system, I-III, the number of water molecules in the ligand binding cavity of hA<sub>2A</sub>R is plotted as a function of MD simulated time over the entire trajectory.
