# Supplementary material for: Binding of the Antagonist Caffeine to the Human Adenosine Receptor hA2AR in Nearly Physiological Conditions
Source: PubMed Central journal article supplement (PMC4439127; doi:10.1371/journal.pone.0126833), 2015-05-20
Supplement: pone.0126833.s010.pdf [file pone.0126833.s010.pdf]

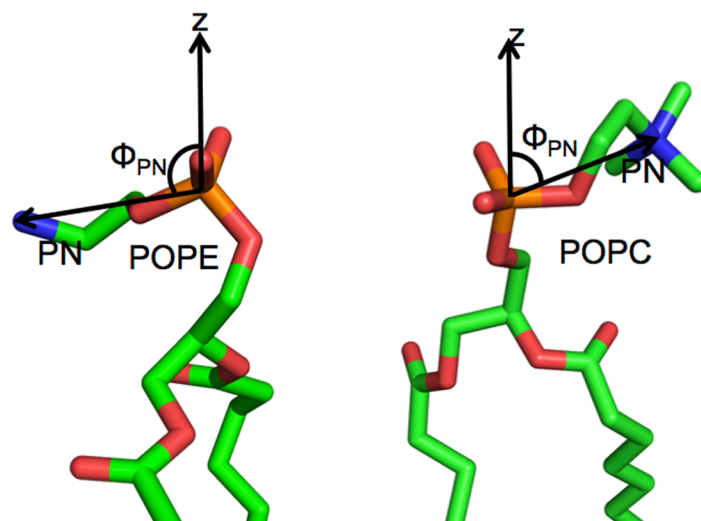

**Supporting Information S10 Fig. Orientation of POPC and POPE headgroups.** This is defined in terms of the PN vector and the  $\Phi_{PN}$  the angle. The first points from the P to N atom, the second is the angle between PN and the z axis. The latter is orthogonal to the membrane (see main text for details).
