# Supplementary material for: Binding of the Antagonist Caffeine to the Human Adenosine Receptor hA2AR in Nearly Physiological Conditions
Source: PubMed Central journal article supplement (PMC4439127; doi:10.1371/journal.pone.0126833), 2015-05-20
Supplement: pone.0126833.s011.pdf [file pone.0126833.s011.pdf]

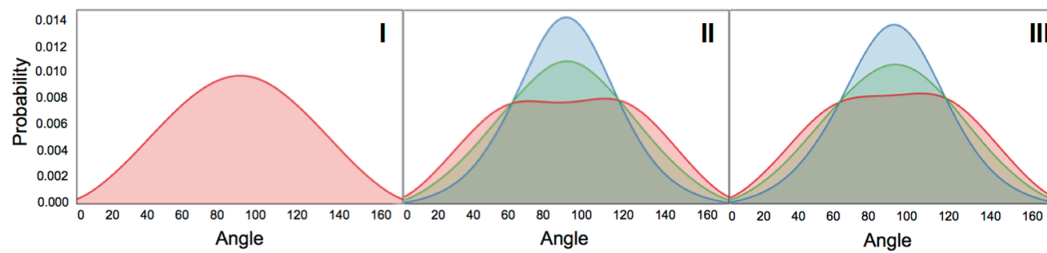

**Supporting Information S11 Fig. Distribution of  $\Phi_{PN}$  of lipid headgroups for systems I-III.** Normalized distribution of  $\Phi_{PN}$ . POPC headgroups, POPE headgroups and overall lipid headgroups are plotted in red, blue and green, respectively.
