# Supplementary material for: Binding of the Antagonist Caffeine to the Human Adenosine Receptor hA2AR in Nearly Physiological Conditions
Source: PubMed Central journal article supplement (PMC4439127; doi:10.1371/journal.pone.0126833), 2015-05-20
Supplement: pone.0126833.s012.pdf [file pone.0126833.s012.pdf]

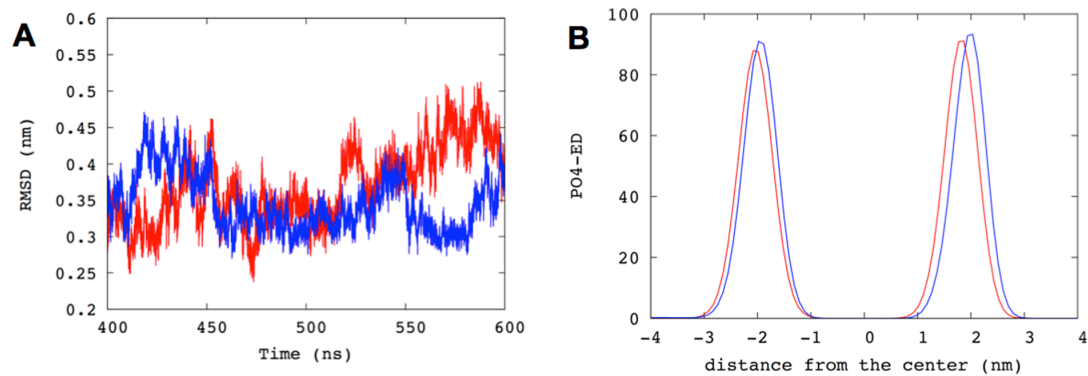

**Supporting Information S12 Fig. Changing the ratio between the lipids in system II.** The POPC:POPE ratio in II is 1 : 1. We consider here a system (II<sub>1.2</sub>) that is the same as II, except that the ratio of POPC:POPE is 1 : 1.2. For this system, we carry out 600 ns MD simulations. **A**) C $\alpha$  root-mean-square-deviations (RMSDs) of the receptor's C $\alpha$  atoms of II (red) and II<sub>1.2</sub> (blue). **B**) MD-averaged density distribution of the phosphate groups (PO4-ED) in the two systems calculated over the 400ns-600ns interval. The color coding is the same as in **A**). The peak-to-peak distance, a measure of the bilayer thickness, is 4.0 and 3.9 for II<sub>1.2</sub> and II, respectively. The RMSD matrices and the MD structures of the receptors in II<sub>1.2</sub>, as collected in the 400ns-600ns interval, are very similar to those of II in the same interval (data not shown).
