# Supplementary material for: Binding of the Antagonist Caffeine to the Human Adenosine Receptor hA2AR in Nearly Physiological Conditions
Source: PubMed Central journal article supplement (PMC4439127; doi:10.1371/journal.pone.0126833), 2015-05-20
Supplement: pone.0126833.s013.pdf [file pone.0126833.s013.pdf]

**Supporting Information S1 Table. Available X-ray structures of hA<sub>2A</sub>R.** X-ray resolution, mutations and missing regions are reported. Underlined structures are the templates used for constructing the model corresponding to the 1-329 residues of hA<sub>2A</sub>R target sequence. For the 4 used templates, bound ligand and all-atom RMSD of the binding cavity with respect 3RFM are also shown. 20 residues within 6.5 Å of CFF in 3RFM were considered for calculation of binding cavity RMSD.

| PDB ID         | X-ray resolution [Å] | Organism                                          | Mutations                                            | Sequence length | Missing residues        | Bound ligand        | binding cavity RMSD [Å] |
|----------------|----------------------|---------------------------------------------------|------------------------------------------------------|-----------------|-------------------------|---------------------|-------------------------|
| 2YDO[1]        | 3.00                 | Homo sapiens                                      | L48A; A54L; T65A; Q89A; N154A                        | 1-325           | 1-5; 214-223; 325       |                     |                         |
| 3REY[2]        | 3.31                 | Homo sapiens                                      | A54L; T88A; R107A; K122A; L202A; L235A; V239A; S277A | 1-329           | 1-6; 150-157; 306-329   |                     |                         |
| 3PWH[2]        | 3.30                 | Homo sapiens                                      | A54L; T88A; K122A; V239A; R107A; L202A; L235A; S277A | 1-329           | 1-6; 150-157; 306-329   |                     |                         |
| <u>2YDV[1]</u> | 2.60                 | Homo sapiens                                      | L48A; A54L; T65A Q89A; N154A                         | 1-325           | 1-2; 215-222            | NEC agonist         | 1.448                   |
| 3VGA[3]        | 3.10                 | Homo sapiens                                      | N154Q                                                | 1-326           | 1-5; 149-155; 309-326   |                     |                         |
| <u>3VG9[3]</u> | 2.70                 | Homo sapiens                                      | N154G                                                | 1-326           | 1-5; 149-155; 310-326   | zm241385 antagonist | 1.328                   |
| <u>3EML[4]</u> | 2.60                 | Homo sapiens                                      | No mutation                                          | 1-488           | -14-2; 149-155; 311-326 | zm241385 antagonist | 1.113                   |
| 3UZC[5]        | 3.34                 | Homo sapiens                                      | A54L; T88A; R107A; K122A; L202A; L235A; V239A; S277A | 1-329           | 1-6; 150-157; 306-329   |                     |                         |
| 3UZA[5]        | 3.27                 | Homo sapiens                                      | A54L; T88A; R107A; K122A; L202A; L235A; V239A; S277A | 1-329           | 1-6; 150-157; 306-329   |                     |                         |
| 3QAK[6]        | 2.71                 | Homo sapiens; Expressed in Enterobacteria phageT4 | C54T; C97A                                           | 1-488           | -14-2; 149-157; 309-326 |                     |                         |
| <u>4EII[7]</u> | 1.80                 | Homo sapiens; Expressed in Escherichia coli       | M29W; H124I; R128L                                   | 1-447           | -24--2; 308-326         | zm241385 antagonist | 1.139                   |
| <u>3RFM[2]</u> | 3.60                 | Homo sapiens                                      | A54L; T88A; R107A; K122A L202A; L235A; V239A; S277A  | 1-329           | 1-6; 150-157; 306-329   | CFF antagonist      |                         |

### Supporting References

1. Lebon G, Warne T, Edwards PC, Bennett K, Langmead CJ, Leslie AGW, et al. (2011) Agonist-bound adenosine A2A receptor structures reveal common features of GPCR activation. *Nature* 474: 521-525.
2. Doré Andrew S, Robertson N, Errey James C, Ng I, Hollenstein K, Tehan B, et al. (2011) Structure of the adenosine A2A receptor in complex with ZM241385 and the xanthines XAC and caffeine. *Structure* 19: 1283-1293.
3. Hino T, Arakawa T, Iwanari H, Yurugi-Kobayashi T, Ikeda-Suno C, Nakada-Nakura Y, et al. (2012) G-protein-coupled receptor inactivation by an allosteric inverse-agonist antibody. *Nature* 482: 237-240.
4. Jaakola V-P, Griffith MT, Hanson MA, Cherezov V, Chien EYT, Lane JR, et al. (2008) The 2.6 Angstrom crystal structure of a human A2A adenosine receptor bound to an antagonist. *Science* 322: 1211-1217.
5. Congreve M, Andrews SP, Doré AS, Hollenstein K, Hurrell E, Langmead CJ, et al. (2012) Discovery of 1,2,4-triazine derivatives as adenosine A2A antagonists using structure based drug design. *Journal of Medicinal Chemistry* 55: 1898-1903.
6. Xu F, Wu H, Katritch V, Han GW, Jacobson KA, Gao Z-G, et al. (2011) Structure of an agonist-bound human A2A adenosine receptor. *Science* 332: 322-327.
7. Liu W, Chun E, Thompson AA, Chubukov P, Xu F, Katritch V, et al. (2012) Structural basis for allosteric regulation of GPCRs by sodium ions. *Science* 337: 232-236.
