# Supplementary material for: Binding of the Antagonist Caffeine to the Human Adenosine Receptor hA2AR in Nearly Physiological Conditions
Source: PubMed Central journal article supplement (PMC4439127; doi:10.1371/journal.pone.0126833), 2015-05-20
Supplement: pone.0126833.s014.pdf [file pone.0126833.s014.pdf]

**Supporting Information S2 Table. Selected membrane properties of systems I-III.** For each system, the receptor-to-lipid hydrogen bonding occupancy ( $\rho_{\text{HB}}^{\text{prt-lip}}$ ), the lipid-to-lipid hydrogen bonding occupancy ( $\rho_{\text{HB}}^{\text{lip-lip}}$ ), the lipid-to-water hydrogen bonding occupancy ( $\rho_{\text{HB}}^{\text{lip-sol}}$ ), and the average area per lipid (APL) are averaged over the last 400 ns of MD simulated time.

| Index                               | I          | II         | III        |
|-------------------------------------|------------|------------|------------|
| $\rho_{\text{HB}}^{\text{prt-lip}}$ | 35/4381    | 35/4389    | 37/4037    |
| $\rho_{\text{HB}}^{\text{lip-lip}}$ | 0          | 317/3968   | 238/3616   |
| $\rho_{\text{HB}}^{\text{lip-SOL}}$ | 3045/30799 | 3084/31212 | 2866/29319 |
| APL (nm <sup>2</sup> )              | 0.61       | 0.56       | 0.50       |
